# Supplementary material for: Tuning MoSO monolayer properties for optoelectronic and spintronic applications: effect of external strain, vacancies and doping
Source: Royal Society of Chemistry journal article supplement (doi:10.1039/d1ra05639e), 2021-01-01
Supplement: d1ra05639e1.pdf [file d1ra05639e1.pdf]

## Tuning MoSO monolayer properties for optoelectronic and spintronic applications: Effect of external strain, vacancy, and doping

Duy Khanh Nguyen,<sup>1</sup> J. Guerrero-Sanchez,<sup>2</sup> Vo Van On,<sup>1</sup> J. F. Rivas-Silva,<sup>3</sup> R Ponce-Pérez,<sup>2</sup> and Gregorio H. Cocoletzi<sup>3</sup>, D. M. Hoat<sup>4,5,\*</sup>

<sup>1</sup>Group of Computational Physics and Simulation of Advanced Materials, Institute of Applied Technology, Thu Dau Mot University, Binh Duong Province, Vietnam

<sup>2</sup>Universidad Nacional Autónoma de México, Centro de Nanociencias y Nanotecnología, Apartado Postal 14, Ensenada, Baja California, Código Postal 22800, Mexico

<sup>3</sup>Benemérita Universidad Autónoma de Puebla, Instituto de Física, Apartado Postal J-48, Puebla 72570, Mexico

<sup>4</sup>Institute of Theoretical and Applied Research, Duy Tan University, Ha Noi 100000, Viet Nam

<sup>5</sup>Faculty of Natural Sciences, Duy Tan University, Da Nang 550000, Viet Nam

\*Corresponding author: dominhhoat@duytan.edu.vn

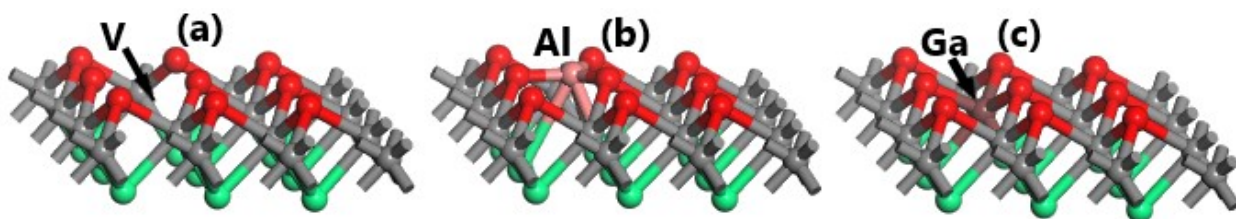

Figure S1: Optimized atomic structure of (a) Mo<sub>V</sub>, (b) Mo<sub>Al</sub>, and (c) Mo<sub>Ga</sub> system.

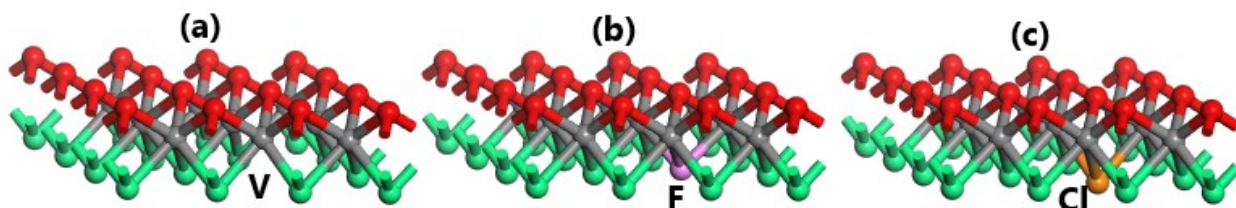

Figure S2: Optimized atomic structure of (a) S<sub>V</sub>, (b) S<sub>F</sub>, and (c) S<sub>Cl</sub> system.

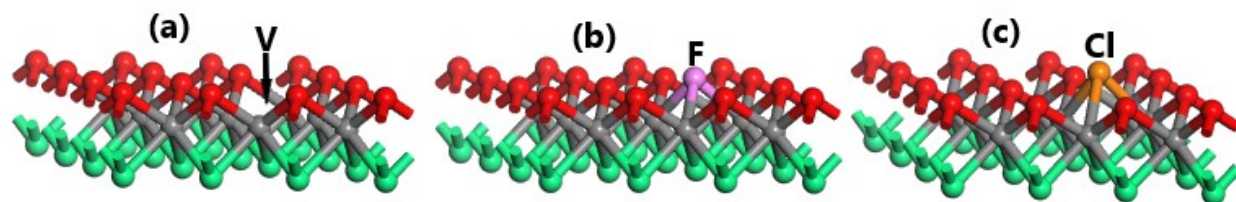

Figure S3: Optimized atomic structure of (a) O<sub>V</sub>, (b) O<sub>F</sub>, and (c) O<sub>Cl</sub> system.

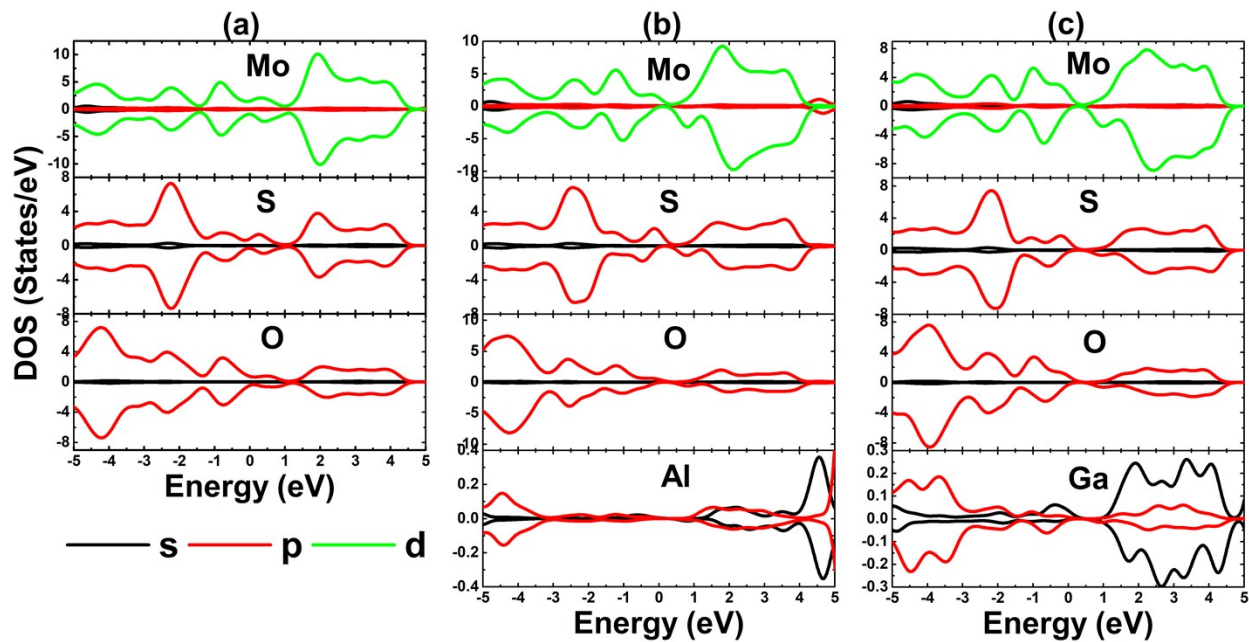

Figure S4: Partial density of states of (a)  $\text{Mo}_V$ , (b)  $\text{Mo}_{Al}$ , and (d)  $\text{Mo}_{Ga}$  system.

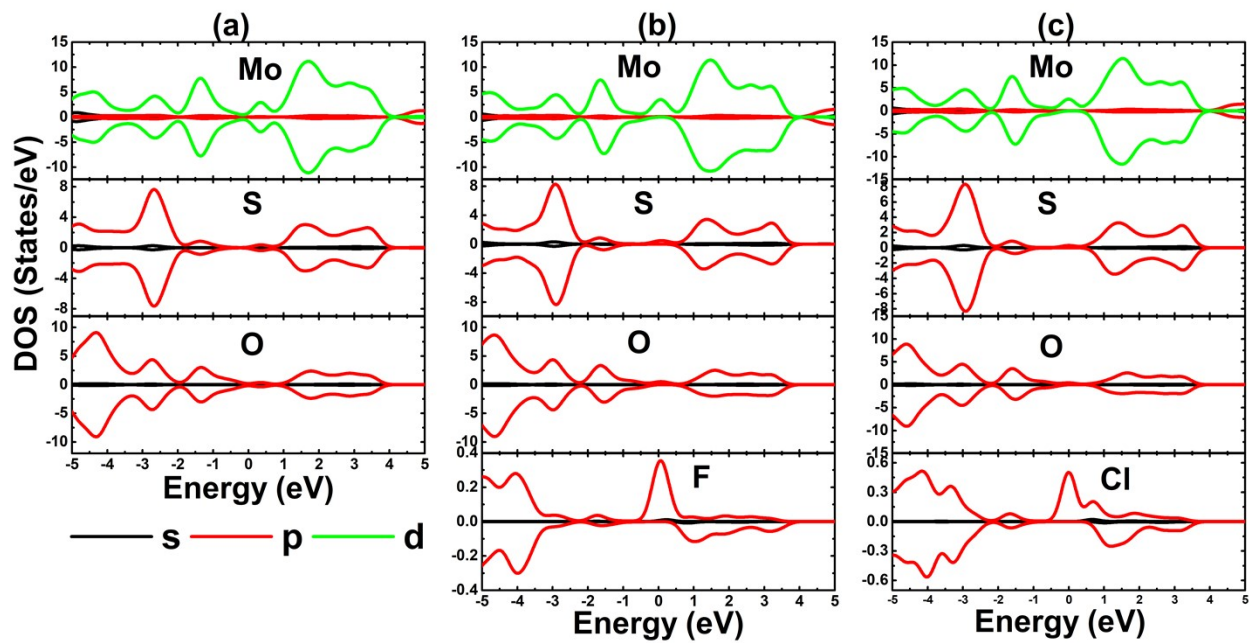

Figure S5: Partial density of states of (a)  $\text{S}_V$ , (b)  $\text{S}_F$ , and (d)  $\text{S}_{Cl}$  system.

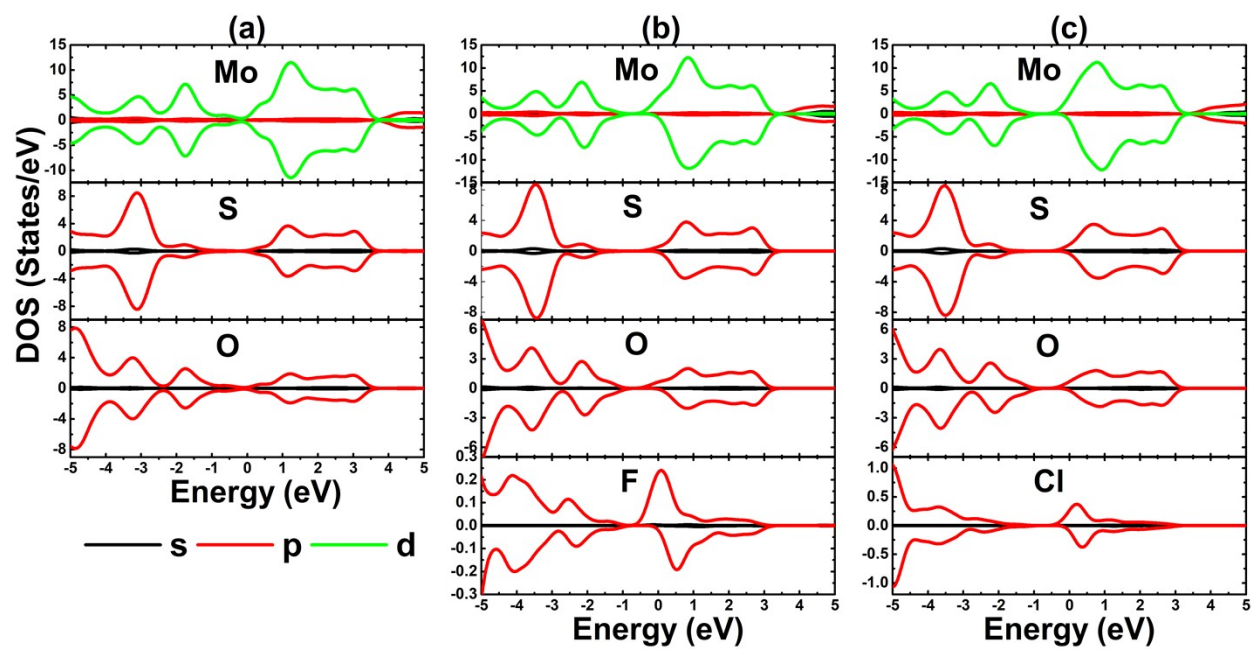

Figure S6: Partial density of states of (a)  $O_V$ , (b)  $O_F$ , and (c)  $O_{Cl}$  system.
